# Supplementary material for: Collective Resistance in Microbial Communities by Intracellular Antibiotic Deactivation
Source: PLoS Biol. 2016 Dec 27;14(12):e2000631. doi: 10.1371/journal.pbio.2000631 (PMC5189934; doi:10.1371/journal.pbio.2000631)
Supplement: S1 Data — (XLSX) [file pbio.2000631.s008.xlsx]

## Sheet: Fig2abde
a
Cm		0								3								3
CmR		+								-								+
Time		OD				RLU				OD				RLU				OD				RLU
0		0.002	0.002	0.002	0.002	234	239	213	260	0.002	0.002	0.002	0.002	221	216	214	184	0.002	0.002	0.002	0.002	212	228	230	184
0.17		0.0021	0.0023	0.00230001	0.0023	286	292	354	356	0.00209999	0.0022	0.0022	0.0016	289	295	268	272	0.0017	0.00169999	0.00209999	0.0023	311	284	275	278
0.33		0.0025	0.0026	0.0029	0.0026	355	379	372	417	0.0022	0.0024	0.0027	0.0018	318	338	343	349	0.0028	0.0023	0.0025	0.00249999	329	303	313	338
0.5		0.0031	0.0031	0.003	0.0031	495	471	504	491	0.0024	0.0028	0.0025	0.0018	362	380	315	314	0.0031	0.0027	0.0029	0.00289999	308	379	334	303
0.67		0.0039	0.0038	0.0038	0.0038	603	612	564	618	0.0026	0.0029	0.0029	0.00230001	346	393	334	357	0.0037	0.00339999	0.0034	0.0036	361	326	306	367
0.83		0.0049	0.0049	0.0047	0.0046	743	741	736	792	0.0032	0.0034	0.0032	0.0026	372	307	335	310	0.0041	0.0037	0.004	0.0041	345	325	360	338
1		0.006	0.0055	0.0054	0.0056	914	955	886	971	0.0031	0.0035	0.0036	0.00280001	314	337	345	296	0.0047	0.0044	0.0042	0.0045	337	412	348	299
1.17		0.0073	0.0067	0.0068	0.0068	1286	1204	1128	1258	0.0035	0.0036	0.0035	0.00280001	367	286	335	363	0.00540001	0.00469999	0.005	0.00519999	343	352	365	298
1.33		0.0086	0.0085	0.0086	0.0083	1801	1615	1651	1740	0.0035	0.0037	0.0038	0.00320001	316	343	307	349	0.006	0.00559999	0.0058	0.0062	336	329	365	340
1.5		0.0108	0.0104	0.0107	0.0106	2291	2248	2237	2275	0.0037	0.00389999	0.004	0.00320001	364	345	305	357	0.0071	0.0063	0.0066	0.0068	352	365	335	388
1.67		0.0134	0.0132	0.0127	0.0132	2971	2959	2999	3178	0.00389999	0.0041	0.0041	0.00370001	370	352	349	340	0.0085	0.00779999	0.0081	0.0085	371	401	399	501
1.83		0.0171	0.0164	0.0166	0.0168	3851	3739	3859	3880	0.004	0.0043	0.0045	0.004	332	317	350	286	0.01	0.0094	0.0098	0.00999999	418	409	407	426
2		0.0215	0.0204	0.0207	0.0216	5091	4867	5158	5170	0.0044	0.0046	0.0046	0.0043	416	328	386	364	0.0121	0.0112	0.0114	0.0121	458	461	475	445
2.17		0.0271	0.026	0.026	0.0273	6477	6393	6369	6697	0.0046	0.0047	0.0049	0.0043	381	364	369	328	0.0149	0.014	0.0141	0.0144	481	503	432	554
2.33		0.0344	0.033	0.0328	0.0342	7844	7673	7887	8183	0.0048	0.005	0.0051	0.0049	402	431	402	377	0.0177	0.0171	0.0173	0.0177	491	580	535	592
2.5		0.0435	0.0415	0.0428	0.0428	9361	9047	9473	9652	0.0053	0.0053	0.0054	0.0048	400	392	377	394	0.0213	0.0206	0.0212	0.0217	586	613	618	676
2.67		0.054	0.0517	0.0535	0.0548	10230	10094	10630	10460	0.0055	0.0054	0.0057	0.0048	383	377	405	411	0.0261	0.0258	0.0264	0.0268	713	734	725	754
2.83		0.0676	0.0659	0.0671	0.07	10810	10955	11120	11259	0.0055	0.0056	0.0057	0.0052	379	380	411	378	0.0325	0.0321	0.0325	0.0328	806	860	850	868
3		0.0844	0.0813	0.0847	0.089	11600	11574	11909	12011	0.00599999	0.0059	0.0061	0.00550001	434	412	418	366	0.0403	0.0401	0.0404	0.041	985	984	986	983
3.17		0.1059	0.1015	0.1047	0.1126	12711	13061	13174	13432	0.00599999	0.0059	0.0061	0.0056	427	404	355	376	0.0498	0.0488	0.0497	0.0513	1131	1216	1141	1144
3.33		0.1307	0.1224	0.1261	0.138	13426	13709	13993	14099	0.0062	0.006	0.0066	0.0058	401	339	340	367	0.0628	0.0603	0.0619	0.0636	1208	1237	1168	1284
3.5		0.1588	0.1525	0.1554	0.1701	13969	14409	14893	15013	0.0063	0.0063	0.0066	0.006	408	326	377	350	0.0766	0.0773	0.0773	0.0789	1378	1338	1353	1447
3.67		0.1907	0.1846	0.1921	0.208	14819	15006	16028	16490	0.0066	0.0066	0.007	0.00630001	362	376	310	370	0.0953	0.0947	0.0951	0.0974	1533	1520	1480	1584
3.83		0.2287	0.2195	0.2309	0.2471	15104	15568	15359	16319	0.00649999	0.0068	0.007	0.0064	385	379	378	355	0.117	0.1154	0.1163	0.1194	1632	1673	1721	1780
4		0.2674	0.2628	0.2679	0.2835	15097	15817	16031	16187	0.0066	0.0068	0.0072	0.00630001	377	323	311	331	0.1425	0.1425	0.1397	0.1457	1786	1749	1828	1901
4.17		0.3119	0.3141	0.3013	0.3247	15278	15750	15867	15979	0.00689999	0.0069	0.0074	0.00670001	324	353	294	337	0.1694	0.1692	0.1679	0.1787	1879	2008	1980	1996
4.33		0.3606	0.3565	0.3507	0.3761	14809	15269	15715	15946	0.0071	0.0071	0.0077	0.00680001	324	330	344	308	0.2009	0.2014	0.1966	0.2098	1970	2102	2049	2214
4.5		0.4297	0.4213	0.4156	0.4323	14825	15268	15558	16405	0.0072	0.00739999	0.0078	0.007	337	295	319	272	0.2446	0.2353	0.2357	0.2466	1936	1978	1911	2139
4.67		0.4912	0.4845	0.4729	0.4931	14575	15104	15132	15324	0.00739999	0.0078	0.008	0.0073	334	271	305	295	0.2919	0.2766	0.2638	0.2815	2040	2111	2113	2198
4.83		0.5509	0.5462	0.532	0.5478	12592	13351	13293	13222	0.0077	0.0079	0.0082	0.00720001	312	293	286	284	0.3389	0.3334	0.3004	0.3461	2020	2126	2107	2129
5		0.597	0.5907	0.585	0.6009	10286	10887	10699	10378	0.00779999	0.0081	0.0083	0.00760001	260	261	233	283	0.3943	0.3804	0.3533	0.397	1977	2015	1972	2058
5.17		0.6353	0.6294	0.6222	0.6277	8575	9083	8991	8891	0.0079	0.00829999	0.0088	0.0078	281	260	270	261	0.4451	0.4301	0.4025	0.4543	1894	2017	1853	2083
5.33		0.6537	0.6475	0.6399	0.6382	6211	6686	6716	6647	0.00819999	0.00829999	0.0089	0.008	268	274	287	224	0.4887	0.4864	0.4554	0.4859	1867	1776	1867	2005
5.5		0.652	0.6497	0.6423	0.6388	5381	5553	5683	5671	0.00819999	0.0086	0.0091	0.0084	269	277	236	266	0.5329	0.5339	0.5089	0.5409	1664	1742	1719	1700
5.67		0.6492	0.6468	0.6419	0.6341	4465	4683	4570	4653	0.0086	0.0087	0.0093	0.0083	249	236	197	216	0.577	0.5811	0.5577	0.5823	1456	1438	1394	1424
5.83		0.6429	0.6412	0.639	0.6307	3748	4013	3994	4067	0.00869999	0.009	0.0095	0.00850001	231	230	252	227	0.6121	0.6076	0.5936	0.6202	1161	1273	1146	1137
6		0.6389	0.6365	0.6351	0.6281	3374	3488	3466	3472	0.0092	0.0095	0.0101	0.00900001	212	201	181	207	0.6315	0.6266	0.6146	0.6352	961	959	926	843
6.17		0.6346	0.6327	0.6317	0.6258	3002	3092	3031	3109	0.0093	0.0094	0.0101	0.00900001	207	230	232	194	0.6345	0.63	0.6258	0.6328	676	675	658	678
6.33		0.6325	0.6296	0.6294	0.6243	2775	2889	2739	2700	0.0095	0.00959999	0.0103	0.0093	224	195	217	184	0.63	0.6271	0.626	0.6281	617	578	571	589
6.5		0.6306	0.6288	0.6285	0.6246	2497	2561	2505	2613	0.0097	0.0099	0.0106	0.0096	207	188	168	166	0.6225	0.6195	0.6202	0.6222	490	469	448	435
6.67		0.6282	0.6267	0.6268	0.6229	2228	2354	2308	2265	0.0097	0.0104	0.011	0.0095	199	228	210	189	0.6181	0.6133	0.6153	0.6193	460	482	417	433
6.83		0.626	0.6241	0.6245	0.6215	2143	2315	2061	2103	0.0099	0.0102	0.011	0.00980001	205	180	180	138	0.6148	0.6109	0.6123	0.6165	419	393	380	364
7		0.6246	0.623	0.6237	0.6213	2017	2071	1938	1991	0.0103	0.0106	0.0115	0.0102	164	200	181	157	0.6128	0.609	0.6106	0.6143	364	381	397	307
7.17		0.6238	0.6223	0.6227	0.6214	1825	1936	1877	1827	0.0104	0.0108	0.0115	0.0102	124	127	137	171	0.6111	0.6069	0.608	0.6128	322	305	338	301
7.33		0.6206	0.6201	0.6206	0.62	1814	1759	1664	1746	0.0105	0.011	0.0119	0.0105	169	145	173	126	0.6085	0.6054	0.606	0.6106	337	309	312	268
7.5		0.6205	0.6199	0.6206	0.6202	1680	1752	1535	1574	0.0112	0.0111	0.0121	0.0109	153	125	109	115	0.607	0.6035	0.6044	0.6101	296	246	231	244
7.67		0.6196	0.6202	0.6209	0.6211	1656	1627	1442	1570	0.0111	0.0116	0.0123	0.0109	154	129	96	123	0.6062	0.6023	0.6028	0.6077	260	277	243	256
7.83		0.6181	0.6191	0.6192	0.6204	1504	1573	1434	1445	0.0111	0.0116	0.0127	0.0112	112	143	141	122	0.6056	0.6016	0.6018	0.6071	253	254	236	257
8		0.6179	0.6192	0.6204	0.6207	1485	1509	1421	1444	0.0113	0.0123	0.0139	0.0115	125	142	97	127	0.6047	0.6007	0.6008	0.6062	249	257	194	247
b
Cm	0	3	3
CmR	+	-	+
T = 0 h	1500000	1500000	1500000
T = 1 h	4400000	1800000	2260000
T = 2 h	13600000	2220000	3240000
T = 3 h	39000000	2020000	8440000
T = 4 h	104000000	1320000	16700000
T = 5 h	180000000	880000	40000000
T = 6 h	240000000	720000	85000000
T = 7 h	280000000	360000	92000000
T = 8 h	260000000	220000	90000000
d
Cm		3								3								3
CmR inoc		0.01								0.001								0.0001
Time		OD				RLU				OD				RLU				OD				RLU
0		0.011	0.011	0.011	0.011	225	253	245	269	0.002	0.002	0.002	0.002	212	228	230	184	0.0011	0.0011	0.0011	0.0011	232	223	258	239
0.17		0.0117	0.0115	0.0108	0.0114	352	349	317	317	0.0017	0.00169999	0.00209999	0.0023	311	284	275	278	0.0013	0.00140001	0.000899997	0.0012	321	317	318	329
0.33		0.0134	0.0123	0.0123	0.0129	360	326	337	349	0.0028	0.0023	0.0025	0.00249999	329	303	313	338	0.0014	0.00190001	0.0015	0.0012	340	371	341	334
0.5		0.0156	0.0138	0.015	0.0152	374	382	366	336	0.0031	0.0027	0.0029	0.00289999	308	379	334	303	0.0018	0.00190001	0.002	0.0016	355	387	352	393
0.67		0.019	0.0174	0.0179	0.0187	388	347	361	380	0.0037	0.00339999	0.0034	0.0036	361	326	306	367	0.002	0.0024	0.0022	0.002	359	368	375	405
0.83		0.0225	0.0207	0.0214	0.0219	370	326	373	426	0.0041	0.0037	0.004	0.0041	345	325	360	338	0.0022	0.0026	0.002	0.0022	387	360	349	378
1		0.027	0.0251	0.0263	0.0263	453	402	405	403	0.0047	0.0044	0.0042	0.0045	337	412	348	299	0.0025	0.0028	0.0024	0.0022	364	369	333	369
1.17		0.0324	0.0312	0.0324	0.0315	431	430	379	436	0.00540001	0.00469999	0.005	0.00519999	343	352	365	298	0.0026	0.0028	0.0025	0.0025	357	321	311	340
1.33		0.0405	0.0387	0.0389	0.0394	543	535	507	527	0.006	0.00559999	0.0058	0.0062	336	329	365	340	0.0029	0.0031	0.0027	0.0026	316	377	343	386
1.5		0.0497	0.0483	0.0496	0.0488	718	643	615	623	0.0071	0.0063	0.0066	0.0068	352	365	335	388	0.0033	0.0033	0.0029	0.0029	341	313	310	373
1.67		0.0596	0.0592	0.0618	0.0616	787	763	771	772	0.0085	0.00779999	0.0081	0.0085	371	401	399	501	0.0031	0.00360001	0.0031	0.0031	404	386	376	341
1.83		0.0746	0.0749	0.079	0.0767	947	930	942	942	0.01	0.0094	0.0098	0.00999999	418	409	407	426	0.0033	0.00410001	0.0033	0.0032	337	371	364	385
2		0.0924	0.0948	0.0988	0.0968	1139	1033	1023	1093	0.0121	0.0112	0.0114	0.0121	458	461	475	445	0.004	0.004	0.0036	0.0035	393	413	400	405
2.17		0.1184	0.1177	0.1215	0.1166	1276	1217	1173	1295	0.0149	0.014	0.0141	0.0144	481	503	432	554	0.0041	0.0042	0.0039	0.0037	437	409	397	366
2.33		0.1441	0.1444	0.148	0.1441	1327	1281	1319	1282	0.0177	0.0171	0.0173	0.0177	491	580	535	592	0.0046	0.0046	0.0043	0.0042	414	381	425	433
2.5		0.1747	0.1803	0.182	0.1736	1228	1228	1231	1284	0.0213	0.0206	0.0212	0.0217	586	613	618	676	0.0047	0.0053	0.0047	0.0048	467	420	416	389
2.67		0.2059	0.2077	0.2174	0.2059	1439	1383	1304	1406	0.0261	0.0258	0.0264	0.0268	713	734	725	754	0.0055	0.0056	0.0052	0.0055	456	452	428	451
2.83		0.2389	0.2447	0.2574	0.2422	1422	1418	1402	1379	0.0325	0.0321	0.0325	0.0328	806	860	850	868	0.0059	0.0061	0.0058	0.0058	468	456	456	431
3		0.2856	0.2885	0.3009	0.2875	1449	1385	1368	1337	0.0403	0.0401	0.0404	0.041	985	984	986	983	0.0066	0.007	0.0063	0.0066	480	480	405	408
3.17		0.3402	0.3416	0.3582	0.3402	1428	1353	1322	1421	0.0498	0.0488	0.0497	0.0513	1131	1216	1141	1144	0.0076	0.0078	0.007	0.0073	467	469	430	421
3.33		0.4114	0.4026	0.4207	0.4095	1509	1453	1455	1409	0.0628	0.0603	0.0619	0.0636	1208	1237	1168	1284	0.0083	0.0087	0.008	0.0085	481	445	477	458
3.5		0.4902	0.4667	0.4819	0.4702	1477	1441	1399	1372	0.0766	0.0773	0.0773	0.0789	1378	1338	1353	1447	0.0096	0.0094	0.0091	0.0095	490	490	425	523
3.67		0.5537	0.5316	0.5343	0.5244	1266	1193	1196	1208	0.0953	0.0947	0.0951	0.0974	1533	1520	1480	1584	0.011	0.0112	0.0103	0.0108	473	510	532	504
3.83		0.598	0.5818	0.5792	0.5747	1076	1083	984	1017	0.117	0.1154	0.1163	0.1194	1632	1673	1721	1780	0.0127	0.0128	0.0119	0.0128	516	496	462	491
4		0.6209	0.6139	0.6083	0.6027	929	806	831	864	0.1425	0.1425	0.1397	0.1457	1786	1749	1828	1901	0.0151	0.0146	0.0134	0.0148	540	517	472	424
4.17		0.6222	0.6167	0.6198	0.6118	656	624	633	665	0.1694	0.1692	0.1679	0.1787	1879	2008	1980	1996	0.0181	0.0171	0.0158	0.0178	457	439	497	482
4.33		0.6238	0.6144	0.6162	0.6087	538	582	514	501	0.2009	0.2014	0.1966	0.2098	1970	2102	2049	2214	0.0215	0.0197	0.0186	0.0209	456	493	469	432
4.5		0.6189	0.6103	0.6136	0.6107	418	455	449	422	0.2446	0.2353	0.2357	0.2466	1936	1978	1911	2139	0.0252	0.0232	0.0219	0.0246	507	459	464	469
4.67		0.6151	0.6077	0.6086	0.6048	355	381	365	332	0.2919	0.2766	0.2638	0.2815	2040	2111	2113	2198	0.0304	0.0272	0.0261	0.0291	486	465	469	446
4.83		0.6118	0.604	0.604	0.6022	336	286	337	302	0.3389	0.3334	0.3004	0.3461	2020	2126	2107	2129	0.0371	0.0332	0.0317	0.0352	518	464	505	524
5		0.6092	0.6009	0.6015	0.6001	284	278	267	270	0.3943	0.3804	0.3533	0.397	1977	2015	1972	2058	0.0442	0.0404	0.0382	0.0427	570	507	474	502
5.17		0.6078	0.5993	0.5992	0.5974	210	267	262	261	0.4451	0.4301	0.4025	0.4543	1894	2017	1853	2083	0.0535	0.0487	0.0462	0.0519	502	524	518	497
5.33		0.6074	0.5964	0.5963	0.5943	259	236	243	255	0.4887	0.4864	0.4554	0.4859	1867	1776	1867	2005	0.0655	0.0584	0.0562	0.0644	578	537	454	556
5.5		0.6067	0.5982	0.597	0.5954	214	200	257	198	0.5329	0.5339	0.5089	0.5409	1664	1742	1719	1700	0.0789	0.0703	0.0689	0.0786	531	501	537	534
5.67		0.606	0.5939	0.593	0.5923	190	196	171	217	0.577	0.5811	0.5577	0.5823	1456	1438	1394	1424	0.0943	0.0859	0.0836	0.0961	613	541	546	596
5.83		0.6059	0.5953	0.5936	0.5924	201	166	166	186	0.6121	0.6076	0.5936	0.6202	1161	1273	1146	1137	0.1141	0.103	0.1002	0.1153	618	574	591	519
6		0.6053	0.5955	0.5911	0.5904	183	146	170	138	0.6315	0.6266	0.6146	0.6352	961	959	926	843	0.1363	0.1236	0.12	0.1391	670	575	558	621
6.17		0.6045	0.5929	0.59	0.5896	131	147	151	154	0.6345	0.63	0.6258	0.6328	676	675	658	678	0.1624	0.1447	0.1422	0.1656	693	610	558	604
6.33		0.6038	0.5928	0.5894	0.5883	154	135	149	169	0.63	0.6271	0.626	0.6281	617	578	571	589	0.1942	0.1724	0.1692	0.1976	750	657	639	647
6.5		0.6045	0.5933	0.5889	0.5898	90	94	145	104	0.6225	0.6195	0.6202	0.6222	490	469	448	435	0.2276	0.2035	0.1978	0.2325	780	637	652	710
6.67		0.6043	0.5927	0.588	0.5869	116	146	143	122	0.6181	0.6133	0.6153	0.6193	460	482	417	433	0.268	0.2395	0.2287	0.273	740	669	659	633
6.83		0.6045	0.5918	0.5865	0.586	147	113	124	87	0.6148	0.6109	0.6123	0.6165	419	393	380	364	0.3123	0.2786	0.2617	0.3132	731	635	597	672
7		0.6049	0.5934	0.5879	0.5882	98	105	127	119	0.6128	0.609	0.6106	0.6143	364	381	397	307	0.3652	0.3247	0.2995	0.363	705	677	643	626
7.17		0.6052	0.5936	0.587	0.5872	95	86	116	96	0.6111	0.6069	0.608	0.6128	322	305	338	301	0.4085	0.3758	0.3384	0.4123	642	583	532	591
7.33		0.605	0.593	0.5859	0.5854	168	106	97	89	0.6085	0.6054	0.606	0.6106	337	309	312	268	0.4628	0.4259	0.3945	0.4643	641	622	564	571
7.5		0.6054	0.5945	0.5873	0.5869	110	100	85	76	0.607	0.6035	0.6044	0.6101	296	246	231	244	0.5088	0.4785	0.4564	0.5115	535	522	483	481
7.67		0.6051	0.5937	0.5871	0.5862	80	86	121	83	0.6062	0.6023	0.6028	0.6077	260	277	243	256	0.5488	0.5334	0.5188	0.5584	490	437	472	405
7.83		0.6057	0.593	0.5866	0.5852	117	106	123	109	0.6056	0.6016	0.6018	0.6071	253	254	236	257	0.5758	0.5671	0.5633	0.5896	397	369	377	402
8		0.6067	0.5937	0.5868	0.5848	109	112	102	98	0.6047	0.6007	0.6008	0.6062	249	257	194	247	0.5976	0.5954	0.5986	0.6158	370	315	306	256
e
Strain		CmS				CmS				CmS				CmS				CmS
treatm.		C-				P				L				S				C+
Time		OD		RLU		OD		RLU		OD		RLU		OD		RLU		OD		RLU
0		0.002	0	2711	95	0.002	0	2644	170	0.002	0	2114	158	0.002	0	2093	16	0.002	0	2267	18
0.17		0.0024	0	3410	82	0.0026	0.00014	3244	28	0.00175	0.00021	2114	158	0.0018	0.00014	2673	100	0.0024	0.00014	2525	4
0.33		0.00306	6e-05	3911	64	0.0031	0	3908	45	0.00235	7e-05	2220	45	0.00245	0.00021	2441	27	0.0026	0.00014	2596	8
0.5		0.00385	0.00021	4929	27	0.0039	0.00014	4564	144	0.00265	7e-05	2090	51	0.00265	7e-05	2531	18	0.003	0.00014	2344	14
0.67		0.0044	0.00014	5443	262	0.0047	0	5454	68	0.00265	7e-05	2304	11	0.00265	7e-05	2234	68	0.00305	0.00021	2272	42
0.83		0.00545	0.00035	6718	283	0.0058	0.00014	6835	89	0.00315	7e-05	2175	66	0.003	0.00014	2302	212	0.00345	7e-05	2138	6
1		0.00665	0.00049	7890	82	0.00685	7e-05	8024	195	0.0034	0.00014	2074	164	0.00305	7e-05	2329	4	0.00365	7e-05	2092	6
1.17		0.0078	0.00028	9609	185	0.008	0	9859	386	0.0032	0	2315	27	0.00315	0.00021	2136	82	0.00365	0.00021	2025	126
1.33		0.0094	0.00042	11633	163	0.01	0	12293	81	0.0038	0	2187	13	0.00355	7e-05	2143	7	0.004	0.00028	1978	221
1.5		0.0115	0.00042	13677	72	0.0123	0.00014	14951	573	0.004	0.00014	2233	231	0.0038	0.00014	2087	83	0.0043	0.00014	2011	103
1.67		0.0137	0.00042	16794	594	0.0147	0	17926	577	0.00435	0.00021	2255	120	0.0039	0.00028	2099	177	0.00435	0.00021	1991	4
1.83		0.0164	0.00042	20105	522	0.0177	0.00021	21790	532	0.00475	7e-05	2392	181	0.00405	7e-05	2134	116	0.00455	0.00021	1813	92
2		0.0196	0.00057	23912	823	0.0214	0.00064	26153	771	0.0049	0.00014	2457	52	0.00425	7e-05	2238	153	0.00485	0.00021	1766	105
2.17		0.0233	0.00021	28580	495	0.0256	0.00064	31711	1379	0.005	0	2486	6	0.0043	0.00014	2000	82	0.0048	0.00028	1799	30
2.33		0.0275	0.00028	34239	1039	0.0305	0.00092	37159	1356	0.00515	0.00021	2604	102	0.00435	0.00021	1966	54	0.0048	0.00028	1710	136
2.5		0.0334	0	39371	810	0.0365	0.00113	43170	1488	0.0055	0	2701	154	0.00465	0.00021	1900	6	0.00535	0.00064	1693	16
2.67		0.0396	7e-05	46947	1039	0.0433	0.00163	51648	1423	0.0056	0	2592	45	0.0047	0.00014	1967	197	0.00495	0.00021	1563	188
2.83		0.0478	0.00042	53796	1097	0.0528	0.00212	59377	1277	0.0066	0.00014	2618	23	0.0054	0.00014	1938	57	0.00565	0.00021	1519	58
3		0.057	0.00078	60455	714	0.0627	0.00297	66534	1850	0.00675	0.00021	2603	160	0.0055	0.00028	1841	1	0.0057	0.00028	1528	91
3.17		0.0676	0.00064	66749	884	0.0745	0.00339	72224	1640	0.00705	7e-05	2604	209	0.0056	0.00014	1895	81	0.0058	0.00042	1427	120
3.33		0.0801	0.00134	70287	1981	0.0888	0.00424	79555	1670	0.00745	7e-05	2786	249	0.0057	0.00028	1715	49	0.00575	0.00035	1392	14
3.5		0.0948	0.00099	77985	2292	0.1048	0.00523	91520	2093	0.00775	0.00021	2595	35	0.00575	0.00035	1646	17	0.0059	0.00028	1317	134
3.67		0.1113	0.00205	85467	3517	0.1204	0.00552	84888	1228	0.00805	7e-05	2494	99	0.006	0.00028	1563	16	0.00595	0.00021	1262	85
3.83		0.1295	0.00304	88936	1691	0.1364	0.00594	84762	843	0.0083	0	2473	10	0.00605	0.00035	1496	107	0.006	0.00028	1190	25
4		0.145	0.00276	99708	1007	0.1535	0.00707	92963	375	0.00875	0.00021	2451	134	0.0062	0.00028	1479	27	0.00605	0.00021	1137	13
4.17		0.1646	0.00559	99632	775	0.1727	0.00799	86428	1748	0.009	0.00014	2390	11	0.0062	0.00042	1501	16	0.0061	0.00042	1102	31
4.33		0.188	0.00707	96440	1853	0.1941	0.0103	89575	1170	0.00945	0.00021	2259	89	0.00635	0.00035	1349	1	0.0062	0.00028	1090	28
4.5		0.213	0.0087	91227	1421	0.2178	0.0136	92747	1243	0.00985	0.00021	2266	23	0.00665	0.00035	1246	68	0.0063	0.00028	991	13
4.67		0.24	0.01	85570	1595	0.2443	0.0173	92963	375	0.0101	0.00014	2042	45	0.00635	0.00064	1203	95	0.00625	7e-05	904	14
4.83		0.27	0.0111	81896	1581	0.2714	0.0191	99758	3162	0.0103	0.00021	2026	25	0.0065	0.00057	1219	89	0.0061	0.00014	935	61
5		0.3014	0.0122	77149	72	0.2968	0.0194	79555	1670	0.0105	0.00014	1905	197	0.00665	0.00049	1106	167	0.0063	0.00014	827	129
5.17		0.33	0.0132	74417	544	0.3182	0.0202	79750	750	0.0108	0.00014	1885	4	0.0066	0.00057	1018	96	0.00655	0.00021	736	82
5.33		0.3595	0.0132	68258	622	0.3366	0.0225	79750	750	0.0111	0.00014	1864	45	0.0067	0.00042	1169	33	0.0064	0.00014	783	89
5.5		0.3914	0.0139	66525	160	0.3544	0.0206	66669	1277	0.0114	0.00021	1895	100	0.00675	0.00064	899	95	0.00645	7e-05	773	52
5.67		0.426	0.0146	51037	165	0.3747	0.0194	64764	3097	0.0119	7e-05	1835	151	0.00675	0.00049	916	23	0.0064	0.00028	613	86
5.83		0.4432	0.00608	51037	165	0.3975	0.0182	69235	346	0.012	0.00014	1644	209	0.00675	0.00049	819	78	0.00655	0.00021	592	42
6		0.4436	0.00552	44031	460	0.4228	0.0102	51234	1861	0.0121	0	1697	27	0.00675	0.00064	703	33	0.0066	0	569	44
6.17		0.4393	0.00339	39106	178	0.4311	0.00686	45734	260	0.0125	0.00021	1628	40	0.00695	0.00049	719	35	0.0066	0.00014	552	82
6.33		0.4344	0.00113	35557	146	0.4207	0.00651	40436	368	0.0129	7e-05	1508	99	0.00705	0.00064	681	98	0.00645	0.00021	482	25
6.5		0.4299	0.00014	32692	441	0.4115	0.00488	36018	687	0.0132	7e-05	1493	10	0.007	0.00071	601	16	0.00655	7e-05	486	6
6.67		0.4266	0.00078	29727	163	0.403	0.00346	31926	554	0.0134	0.00028	1399	61	0.007	0.00085	638	37	0.0066	0.00014	532	23
6.83		0.4243	0.00071	27460	410	0.3978	0.00255	29072	693	0.0136	7e-05	1349	86	0.00715	0.00078	524	42	0.0065	0	458	102
7		0.4222	0.00134	25325	222	0.3936	0.00233	27089	474	0.0139	7e-05	1323	49	0.00715	0.00064	497	24	0.00675	0.00021	392	8
7.17		0.4207	0.00212	23587	27	0.3905	0.00198	24894	396	0.0142	7e-05	1252	17	0.00725	0.00064	519	126	0.00675	0.00021	394	3
7.33		0.4191	0.00226	22140	71	0.3888	0.00092	23176	23	0.0143	0.00021	1307	112	0.00735	0.00064	441	33	0.0067	0	318	11
7.5		0.4188	0.00226	20963	182	0.3867	0.00042	21590	651	0.0146	7e-05	1315	78	0.0073	0.00071	430	14	0.0068	0.00028	326	8
7.67		0.4182	0.00311	19178	3	0.3847	0.00078	19982	173	0.0147	7e-05	1255	24	0.0073	0.00071	488	11	0.00665	7e-05	314	45
7.83		0.4177	0.00247	18247	157	0.3837	0.00021	18744	91	0.0152	0.00014	1202	158	0.00735	0.00078	445	4	0.0068	0	270	28
8		0.4185	0.00269	17093	298	0.3841	0.00057	17662	252	0.0152	7e-05	1158	93	0.0074	0.00085	337	18	0.0069	0	298	14

## Sheet: Fig5ab
a						b
Strain	CmS	CmS	CmS+CmR	CmS+CmR		Strain	CmS+CmR	CmS+CmR
Cm	-	+	-	+		Cm	-	+
log CFUs	4.81	5.1	6.65	5		% CmR	44.44	33.33
log CFUs	4.98	3.93	5.43	3.7		% CmR	62.96	33.33
log CFUs	5.11	5.02	5.59	5.11		% CmR	61.11	66.67
log CFUs	5.44	3.93	4.4	3.95		% CmR	54.05	58.82
log CFUs	5.3	4.82	4.93	5		% CmR	52.83	37.04
log CFUs	6.84	2.74	5.28	4.81		% CmR	41	56
log CFUs	5.15	4.08	5.36	5.38		% CmR	72	61.54
log CFUs	7.45	4.28	6.78	5.88		% CmR	33	6
log CFUs	6.1	5.27	5.23	6.78		% CmR	69	2.08
log CFUs	6.61	5.57	5.4	5.6		% CmR		2.08
log CFUs	5.66	4.88	6.81	6.66		% CmR		1
log CFUs	5.18	5.37	6.65	5.06		% CmR		4.55
log CFUs	5.3	5.37	6.38	6.79		% CmR		6.25
log CFUs	4.76			5.81		% CmR		53.85

## Sheet: S1Fig_abc
a													b											c
Strain		KmS				KmR+KmS				KmR			GmS				GmR+GmS				GmR			CmS				CmR+CmS				CmR
Ab		+				+				+			+				+				+			+				+				+
Time		OD		RLU		OD		RLU		OD			OD		RLU		OD		RLU		OD			OD		RLU		OD		RLU		OD
0		0.00233	0.00017	294	16	0.00213	0.00013	303	16	0.00233	0.00025		0.00233	0.0003	291	22	0.00233	0.0001	284	11	0.00225	0.00021		0.00235	0.00031	265	11	0.00225	0.00029	277	8	0.0022	0.00042
0.17		0.00285	0.00019	387	54	0.00255	0.00013	351	22	0.00265	0.00021		0.0026	0.00016	349	4	0.00273	0.00039	359	18	0.0026	0.00014		0.00238	0.00017	268	11	0.00243	0.00026	257	15	0.00235	0.00037
0.33		0.0034	0.00026	446	7	0.00328	5e-05	454	20	0.00338	0.0003		0.0032	0.00022	438	61	0.00308	0.0001	458	39	0.00313	0.00017		0.00283	0.00036	263	24	0.00283	0.00019	287	26	0.00295	0.00049
0.5		0.00418	0.00021	485	16	0.0043	0.00012	485	13	0.00465	0.00034		0.0036	0.00017	504	42	0.0038	8e-05	494	17	0.00415	0.00017		0.00298	0.00022	252	29	0.00338	0.0001	262	14	0.00395	0.00039
0.67		0.0049	0.00018	542	14	0.00525	0.00017	539	5	0.006	0.00029		0.00415	0.00033	622	28	0.00493	0.00013	678	26	0.00518	0.00019		0.00313	0.00021	252	29	0.004	0.00014	288	38	0.00493	0.00038
0.83		0.00563	0.0001	551	23	0.00643	0.00013	606	34	0.0074	0.00051		0.00503	0.00024	712	27	0.00593	0.00019	726	74	0.00618	0.00022		0.00328	0.0001	271	50	0.00465	0.00019	272	10	0.00598	0.00028
1		0.0064	0.00016	589	32	0.00783	0.00024	616	24	0.0094	0.00027		0.00606	8e-05	712	27	0.00653	0.00019	726	74	0.00768	0.00036		0.00348	0.00029	240	21	0.00548	0.00015	259	16	0.00748	0.00038
1.17		0.0072	0.00012	606	62	0.00955	0.0004	612	8	0.0118	0.00052		0.00738	6e-05	898	20	0.0073	8e-05	927	39	0.00948	0.00049		0.00355	0.00013	270	11	0.00635	0.00029	296	18	0.00915	0.00029
1.33		0.00828	0.0001	598	40	0.0114	0.00039	614	56	0.0149	0.00078		0.0087	0.00013	947	8	0.0089	0.00014	977	91	0.0121	0.00048		0.00388	0.00015	264	13	0.0075	0.00022	292	27	0.0117	0.00046
1.5		0.009	0.00036	564	11	0.0139	0.00041	559	10	0.0183	0.00084		0.0087	0.00013	765	2	0.0115	0.00059	781	18	0.0148	0.00075		0.00398	0.00025	264	23	0.0092	0.00024	316	15	0.0147	0.00041
1.67		0.01	0.00017	506	2	0.0168	0.00048	595	20	0.0232	0.00062		0.0101	0.00017	949	31	0.0148	0.00217	848	1	0.0185	0.00094		0.0043	0.00022	273	13	0.0111	0.00028	306	27	0.0182	0.00062
1.83		0.0108	0.00037	562	40	0.0202	0.00054	521	18	0.0295	0.00046		0.0115	0.00022	849	38	0.017	0.00022	813	13	0.0234	0.00129		0.0045	0.00024	261	23	0.0134	0.0001	329	20	0.023	0.00052
2		0.0115	0.00048	529	4	0.0239	0.00068	485	14	0.0363	0.00065		0.0115	0.00022	701	48	0.0208	0.00038	634	56	0.0286	0.00142		0.00475	0.00025	243	28	0.0162	0.00034	333	13	0.0289	0.00099
2.17		0.0121	0.0005	427	46	0.0291	0.00088	401	33	0.0459	0.00083		0.0128	0.00037	698	5	0.0251	0.00033	634	56	0.0361	0.00173		0.0048	0.00028	253	17	0.0198	0.00035	400	31	0.0365	0.00082
2.33		0.0128	0.00069	386	42	0.036	0.00076	412	7	0.0579	0.00048		0.0131	0.00045	592	49	0.0308	0.00025	512	63	0.0461	0.0023		0.0051	0.00022	272	18	0.0252	0.0005	435	12	0.0461	0.00123
2.5		0.0132	0.00062	368	23	0.0437	0.00108	306	26	0.072	0.00127		0.014	0.00053	533	49	0.0382	0.00027	388	43	0.0572	0.00249		0.00523	0.00021	275	40	0.0311	0.00069	520	22	0.0577	0.00135
2.67		0.0137	0.0006	370	5	0.0546	0.00092	266	25	0.0892	0.00108		0.0145	0.00061	529	13	0.0468	0.00062	256	26	0.0726	0.00278		0.00548	0.00028	247	18	0.0393	0.00056	584	17	0.0733	0.00187
2.83		0.0139	0.00064	345	21	0.067	0.00158	192	13	0.1116	0.00151		0.0149	0.00083	452	46	0.0582	0.00107	255	19	0.0912	0.00275		0.00558	0.00038	256	12	0.0501	0.00132	657	32	0.0913	0.00222
3		0.014	0.00071	270	12	0.0837	0.00347	170	23	0.1357	0.00328		0.0151	0.00091	369	25	0.0725	0.00199	212	41	0.114	0.00213		0.0059	0.00032	244	25	0.0646	0.00267	740	31	0.1142	0.00335
3.17		0.0143	0.00081	282	52	0.1025	0.00281	158	11	0.166	0.00493		0.0154	0.00105	359	16	0.0892	0.00246	165	30	0.1392	0.00308		0.006	0.00023	224	36	0.0829	0.00391	775	51	0.1403	0.00431
3.33		0.0145	0.00074	221	8	0.126	0.00346	126	36	0.2001	0.00856		0.0158	0.00111	307	37	0.111	0.00363	121	18	0.171	0.00308		0.00608	0.00033	230	23	0.1059	0.00557	850	29	0.1705	0.00519
3.5		0.0146	0.00086	209	1	0.1531	0.00275	110	18	0.2362	0.0124		0.0158	0.00115	244	19	0.1348	0.00325	108	4	0.2094	0.00413		0.00638	0.00038	236	19	0.1328	0.00679	969	59	0.2087	0.00556
3.67		0.0147	0.00078	205	23	0.1827	0.00401	82	18	0.2772	0.014		0.0158	0.00115	206	14	0.1632	0.0044	53	1	0.2481	0.0047		0.00643	0.00043	196	16	0.164	0.0068	1063	70	0.246	0.00732
3.83		0.0147	0.00084	176	1	0.2157	0.00391	68	19	0.3258	0.0233		0.016	0.00131	228	18	0.1931	0.00289	57	1	0.2951	0.0079		0.00663	0.00049	201	28	0.2002	0.00479	1078	54	0.2926	0.00942
4		0.0149	0.00092	170	25	0.2518	0.0053	77	13	0.3838	0.029		0.0157	0.00125	218	21	0.228	0.00201	74	4	0.3456	0.00974		0.00685	0.00057	194	17	0.2426	0.00408	1164	63	0.3433	0.0164
4.17		0.0151	0.00091	149	33	0.2955	0.00875	53	11	0.4431	0.0301		0.0157	0.0013	178	13	0.2594	0.00509	51	7	0.4183	0.0113		0.00693	0.00055	187	11	0.2815	0.00635	1187	56	0.4149	0.0184
4.33		0.0153	0.001	138	3	0.345	0.0101	24	26	0.5188	0.03		0.0158	0.00132	155	73	0.3029	0.00576	11	8	0.4843	0.0114		0.00703	0.0007	172	22	0.3309	0.00404	1199	23	0.4747	0.0119
4.5		0.0154	0.00103	108	4	0.4024	0.0172	37	4	0.573	0.0304		0.0159	0.0014	133	11	0.3507	0.00757	44	3	0.5509	0.013		0.00715	0.00081	159	13	0.3949	0.0084	1198	37	0.5327	0.0119
4.67		0.0153	0.00095	86	14	0.4764	0.019	23	14	0.6132	0.0194		0.0159	0.00143	132	23	0.4076	0.0139	20	21	0.6105	0.0113		0.00743	0.00101	183	11	0.4499	0.00608	1242	26	0.5897	0.00514
4.83		0.0154	0.00124	105	4	0.5355	0.0232	6	1	0.6268	0.012		0.0159	0.00143	87	3	0.4589	0.00974	1	0	0.6451	0.00532		0.0076	0.00092	173	19	0.5129	0.00943	1197	33	0.6327	0.00439
5		0.0156	0.00133	93	21	0.5832	0.0132	25	2	0.6235	0.00954		0.016	0.00141	110	4	0.513	0.0119	37	3	0.6509	0.00191		0.00778	0.00106	167	26	0.56	0.00773	1081	62	0.6481	0.00529
5.17		0.0154	0.00135	76	1	0.6176	0.0083	5	6	0.6254	0.00905		0.0161	0.00145	71	27	0.5576	0.01	1	0	0.6436	0.00418		0.0078	0.00126	168	5	0.602	0.0047	905	28	0.6437	0.00667
5.33		0.0156	0.00143	77	4	0.6205	0.00424	27	15	0.6256	0.00943		0.0161	0.00148	69	17	0.6003	0.00513	8	10	0.6407	0.00701		0.00805	0.00124	149	16	0.6332	0.00511	759	44	0.6399	0.00929
5.5		0.0156	0.00147	57	1	0.6162	0.00405	17	1	0.6288	0.00952		0.0161	0.00148	84	6	0.6173	0.00438	19	1	0.6384	0.0108		0.00818	0.00131	154	23	0.6374	0.00754	555	26	0.6355	0.0121
5.67		0.0157	0.00156	68	13	0.616	0.00292	4	2	0.6288	0.00891		0.0162	0.00159	69	42	0.6152	0.00764	5	1	0.6373	0.0119		0.0085	0.00119	117	14	0.6284	0.00782	486	8	0.632	0.0141
5.83		0.0157	0.00176	58	10	0.6163	0.0015	12	16	0.6292	0.00844		0.0161	0.00162	58	12	0.6066	0.00711	4	4	0.6357	0.0133		0.00863	0.00125	121	18	0.6254	0.00526	398	14	0.6302	0.015
6		0.0159	0.00175	56	6	0.6163	0.00141	11	2	0.6297	0.00749		0.0163	0.00167	48	1	0.6037	0.00632	16	3	0.6343	0.0142		0.00898	0.0012	111	11	0.6208	0.00483	326	16	0.6276	0.0154
6.17		0.016	0.00194	53	23	0.6159	0.00196	2	1	0.6294	0.00759		0.0162	0.0016	52	2	0.6018	0.00595	19	1	0.6324	0.0146		0.00905	0.00142	132	9	0.6188	0.00409	294	15	0.6262	0.0153
6.33		0.0161	0.00194	52	6	0.6148	0.0014	16	15	0.629	0.00754		0.0164	0.00163	49	35	0.5994	0.00598	13	5	0.6312	0.0146		0.00898	0.00196	102	14	0.6169	0.00389	234	19	0.6249	0.0155
6.5		0.0161	0.00214	37	8	0.6143	0.00188	9	0	0.6297	0.00787		0.0164	0.00162	28	6	0.5975	0.00564	10	1	0.6301	0.0151		0.00908	0.00217	105	12	0.6149	0.0042	243	23	0.6233	0.0163
6.67		0.016	0.00227	39	6	0.6143	0.00229	10	1	0.6289	0.00781		0.0168	0.00163	40	17	0.5959	0.00558	9	11	0.6304	0.0149		0.0092	0.00241	102	10	0.6139	0.00379	205	18	0.6224	0.0163
6.83		0.0162	0.00241	32	2	0.6126	0.00183	10	6	0.6294	0.00761		0.0169	0.00168	44	6	0.5951	0.00523	19	7	0.6291	0.0143		0.00938	0.00263	110	9	0.6123	0.00381	195	26	0.621	0.0164
7		0.016	0.00244	34	6	0.6126	0.00216	7	0	0.6295	0.00793		0.0168	0.00168	17	3	0.5931	0.00549	7	0	0.6299	0.0143		0.0095	0.00261	90	10	0.612	0.00389	173	21	0.6206	0.0167
7.17		0.0163	0.00269	39	13	0.6126	0.00148	17	0	0.6301	0.00741		0.017	0.00165	13	4	0.593	0.00578	1	0	0.629	0.0154		0.00965	0.00288	90	13	0.6122	0.00357	165	1	0.6198	0.0175
7.33		0.0163	0.00295	32	0	0.6123	0.00102	2	1	0.6302	0.00788		0.017	0.00151	34	15	0.5923	0.00587	29	18	0.6295	0.0153		0.00973	0.003	88	5	0.6116	0.00372	152	13	0.6199	0.0175
7.5		0.0163	0.00295	25	1	0.6131	0.00132	8	0	0.6304	0.00834		0.0171	0.00162	10	1	0.5916	0.00593	5	0	0.6288	0.0152		0.0102	0.00301	74	12	0.6118	0.00316	154	8	0.6197	0.0178
7.67		0.0164	0.00325	16	21	0.6125	0.00206	5	6	0.6316	0.00768		0.0171	0.00166	34	12	0.5917	0.00617	14	18	0.6282	0.0155		0.0103	0.00291	74	12	0.6115	0.00294	137	19	0.6189	0.0174
7.83		0.0165	0.0034	16	21	0.6132	0.00216	1	0	0.6319	0.00765		0.0171	0.00165	1	0	0.5915	0.00616	13	13	0.6295	0.0149		0.0104	0.00302	63	19	0.612	0.00294	157	25	0.62	0.0176
8		0.0167	0.00365	18	2	0.6133	0.0016	2	1	0.6324	0.00771		0.0176	0.00157	8	1	0.592	0.00623	1	0	0.6291	0.0152		0.0112	0.00376	69	13	0.6116	0.00265	134	27	0.6191	0.0181

## Sheet: S2Fig_ab
a
Cm		0								5								5
CmR		+								-								+
Time		OD				RLU				OD				RLU				OD				RLU
0		0.002	0.002	0.002	0.002	234	239	213	260	0.002	0.002	0.002	0.002	220	220	191	226	0.002	0.002	0.002	0.002	236	215	201	271
0.17		0.0021	0.0023	0.00230001	0.0023	286	292	354	356	0.0019	0.002	0.00159999	0.0022	335	242	281	306	0.0023	0.0026	0.0023	0.002	276	278	259	277
0.33		0.0025	0.0026	0.0029	0.0026	355	379	372	417	0.0022	0.0024	0.00209999	0.0025	328	314	284	307	0.0027	0.003	0.0027	0.00249999	320	324	341	310
0.5		0.0031	0.0031	0.003	0.0031	495	471	504	491	0.0025	0.0026	0.002	0.0026	328	314	331	307	0.00299999	0.0032	0.003	0.0028	305	343	333	316
0.67		0.0039	0.0038	0.0038	0.0038	603	612	564	618	0.0027	0.0031	0.0024	0.0029	311	360	342	365	0.0037	0.0035	0.0033	0.0035	298	336	307	357
0.83		0.0049	0.0049	0.0047	0.0046	743	741	736	792	0.0031	0.0033	0.0027	0.0031	307	333	312	316	0.0041	0.00389999	0.0038	0.00389999	278	336	293	352
1		0.006	0.0055	0.0054	0.0056	914	955	886	971	0.0031	0.0034	0.0026	0.0033	308	282	283	323	0.0046	0.0047	0.0043	0.00429999	292	327	316	310
1.17		0.0073	0.0067	0.0068	0.0068	1286	1204	1128	1258	0.0036	0.0037	0.00299999	0.0034	263	264	277	276	0.0053	0.0054	0.0051	0.0051	239	286	319	281
1.33		0.0086	0.0085	0.0086	0.0083	1801	1615	1651	1740	0.0034	0.0038	0.0031	0.0039	294	260	299	293	0.00609999	0.006	0.0061	0.00559999	271	265	291	297
1.5		0.0108	0.0104	0.0107	0.0106	2291	2248	2237	2275	0.0037	0.00389999	0.0032	0.0037	292	237	248	260	0.0072	0.0072	0.0067	0.0067	281	255	259	320
1.67		0.0134	0.0132	0.0127	0.0132	2971	2959	2999	3178	0.0038	0.0042	0.0035	0.0038	277	237	306	273	0.0086	0.0086	0.0079	0.00819999	277	290	305	306
1.83		0.0171	0.0164	0.0166	0.0168	3851	3739	3859	3880	0.0039	0.0043	0.0037	0.0042	244	247	246	205	0.0099	0.0099	0.0095	0.00959999	287	249	265	297
2		0.0215	0.0204	0.0207	0.0216	5091	4867	5158	5170	0.0042	0.0044	0.00379999	0.0048	271	288	243	235	0.0119	0.0117	0.0118	0.0117	232	297	316	295
2.17		0.0271	0.026	0.026	0.0273	6477	6393	6369	6697	0.0046	0.0047	0.00389999	0.0046	211	210	273	272	0.0147	0.0141	0.0139	0.0144	256	254	265	311
2.33		0.0344	0.033	0.0328	0.0342	7844	7673	7887	8183	0.0044	0.0047	0.0042	0.0047	264	277	249	238	0.017	0.0171	0.0164	0.0177	288	270	317	284
2.5		0.0435	0.0415	0.0428	0.0428	9361	9047	9473	9652	0.0044	0.0049	0.00429999	0.00500001	216	252	223	252	0.0208	0.0209	0.0202	0.0215	336	269	302	335
2.67		0.054	0.0517	0.0535	0.0548	10230	10094	10630	10460	0.0048	0.005	0.0044	0.0049	227	201	203	232	0.0254	0.0255	0.0256	0.0265	316	372	324	366
2.83		0.0676	0.0659	0.0671	0.07	10810	10955	11120	11259	0.0047	0.00519999	0.0044	0.0053	210	242	225	187	0.0309	0.0312	0.0311	0.0329	340	316	425	321
3		0.0844	0.0813	0.0847	0.089	11600	11574	11909	12011	0.0049	0.0053	0.0045	0.0053	182	250	217	173	0.0385	0.0391	0.0382	0.041	377	329	342	382
3.17		0.1059	0.1015	0.1047	0.1126	12711	13061	13174	13432	0.0048	0.0053	0.005	0.0056	206	166	203	177	0.0472	0.0474	0.0476	0.051	349	349	350	346
3.33		0.1307	0.1224	0.1261	0.138	13426	13709	13993	14099	0.0053	0.0054	0.0049	0.0056	155	172	181	142	0.0577	0.0587	0.0582	0.0651	391	375	412	357
3.5		0.1588	0.1525	0.1554	0.1701	13969	14409	14893	15013	0.0053	0.0054	0.0049	0.0058	191	175	176	186	0.0712	0.0713	0.072	0.0827	347	408	422	422
3.67		0.1907	0.1846	0.1921	0.208	14819	15006	16028	16490	0.0054	0.0055	0.0053	0.0059	107	167	166	180	0.0872	0.0882	0.0885	0.1038	378	400	428	427
3.83		0.2287	0.2195	0.2309	0.2471	15104	15568	15359	16319	0.0055	0.0056	0.00519999	0.0059	122	137	149	143	0.1064	0.1073	0.1079	0.1282	428	419	450	463
4		0.2674	0.2628	0.2679	0.2835	15097	15817	16031	16187	0.0053	0.0057	0.00519999	0.006	126	127	124	126	0.1301	0.1313	0.1318	0.1577	459	436	456	465
4.17		0.3119	0.3141	0.3013	0.3247	15278	15750	15867	15979	0.0056	0.0059	0.0055	0.0064	137	109	180	148	0.1574	0.1576	0.1618	0.1922	451	499	524	494
4.33		0.3606	0.3565	0.3507	0.3761	14809	15269	15715	15946	0.0058	0.0059	0.0054	0.0064	121	111	112	107	0.1861	0.1901	0.1932	0.2309	529	520	569	525
4.5		0.4297	0.4213	0.4156	0.4323	14825	15268	15558	16405	0.0057	0.0062	0.00559999	0.0065	117	101	122	93	0.2182	0.2253	0.2296	0.2777	452	434	475	441
4.67		0.4912	0.4845	0.4729	0.4931	14575	15104	15132	15324	0.0061	0.0063	0.0058	0.0066	95	129	100	90	0.2543	0.2629	0.2727	0.3234	473	497	462	526
4.83		0.5509	0.5462	0.532	0.5478	12592	13351	13293	13222	0.0062	0.0064	0.0058	0.0069	121	105	81	106	0.2996	0.3135	0.3165	0.3607	444	467	444	477
5		0.597	0.5907	0.585	0.6009	10286	10887	10699	10378	0.0061	0.0064	0.00599999	0.00720001	66	99	80	92	0.3494	0.3628	0.3657	0.4295	357	393	428	425
5.17		0.6353	0.6294	0.6222	0.6277	8575	9083	8991	8891	0.0063	0.0067	0.0063	0.00720001	91	96	112	71	0.4199	0.4252	0.4171	0.4702	424	373	366	429
5.33		0.6537	0.6475	0.6399	0.6382	6211	6686	6716	6647	0.0064	0.0068	0.0063	0.0073	97	130	91	83	0.4793	0.4802	0.4718	0.5433	310	378	367	403
5.5		0.652	0.6497	0.6423	0.6388	5381	5553	5683	5671	0.0064	0.007	0.00649999	0.0075	92	127	103	113	0.5356	0.5289	0.5243	0.579	333	333	320	330
5.67		0.6492	0.6468	0.6419	0.6341	4465	4683	4570	4653	0.0065	0.0071	0.00649999	0.0075	82	98	55	61	0.5753	0.5657	0.5635	0.6022	263	275	259	275
5.83		0.6429	0.6412	0.639	0.6307	3748	4013	3994	4067	0.0068	0.0072	0.0068	0.0079	96	100	72	68	0.6094	0.602	0.5983	0.6183	203	224	223	187
6		0.6389	0.6365	0.6351	0.6281	3374	3488	3466	3472	0.0073	0.0076	0.0073	0.0083	80	116	71	90	0.6271	0.6247	0.6224	0.6261	170	127	175	175
6.17		0.6346	0.6327	0.6317	0.6258	3002	3092	3031	3109	0.0071	0.0076	0.0081	0.0081	46	67	83	94	0.6316	0.6298	0.6281	0.6219	110	99	115	97
6.33		0.6325	0.6296	0.6294	0.6243	2775	2889	2739	2700	0.0072	0.0079	0.0072	0.00850001	54	73	96	71	0.6263	0.6271	0.6271	0.616	97	62	103	93
6.5		0.6306	0.6288	0.6285	0.6246	2497	2561	2505	2613	0.0077	0.0082	0.00779999	0.0087	33	57	51	65	0.6211	0.6209	0.6222	0.6119	54	80	84	48
6.67		0.6282	0.6267	0.6268	0.6229	2228	2354	2308	2265	0.0078	0.00829999	0.0079	0.0087	80	81	87	90	0.6142	0.6143	0.6157	0.609	77	108	75	110
6.83		0.626	0.6241	0.6245	0.6215	2143	2315	2061	2103	0.0078	0.0084	0.0084	0.00890001	85	99	100	56	0.6105	0.6091	0.6127	0.6085	76	84	92	89
7		0.6246	0.623	0.6237	0.6213	2017	2071	1938	1991	0.008	0.0086	0.00819999	0.00890001	84	77	75	98	0.6061	0.6068	0.6094	0.6058	57	82	95	94
7.17		0.6238	0.6223	0.6227	0.6214	1825	1936	1877	1827	0.0082	0.0087	0.0085	0.0091	40	66	56	52	0.6051	0.6039	0.6067	0.6059	63	51	35	64
7.33		0.6206	0.6201	0.6206	0.62	1814	1759	1664	1746	0.0083	0.0092	0.00909999	0.0099	78	56	68	60	0.602	0.6012	0.6051	0.6053	58	67	71	29
7.5		0.6205	0.6199	0.6206	0.6202	1680	1752	1535	1574	0.0084	0.009	0.0088	0.0095	46	27	49	38	0.6002	0.5986	0.6031	0.6046	13	33	26	39
7.67		0.6196	0.6202	0.6209	0.6211	1656	1627	1442	1570	0.0107	0.0093	0.00959999	0.00980001	40	48	65	54	0.5986	0.597	0.6011	0.6052	39	37	43	43
7.83		0.6181	0.6191	0.6192	0.6204	1504	1573	1434	1445	0.0116	0.0097	0.0099	0.01	60	84	47	63	0.5962	0.5952	0.6	0.6045	41	35	48	39
8		0.6179	0.6192	0.6204	0.6207	1485	1509	1421	1444	0.0092	0.0099	0.0113	0.0105	75	35	61	56	0.5962	0.5942	0.5989	0.6051	47	39	35	52
b
Cm	0	5	5
CmR	+	-	+
T = 0 h	1500000	1500000	1500000
T = 1 h	4400000	1620000	1960000
T = 2 h	13600000	1480000	2040000
T = 3 h	39000000	1080000	2320000
T = 4 h	104000000	590000	4200000
T = 5 h	180000000	220000	12000000
T = 6 h	240000000	110000	21000000
T = 7 h	280000000	40000	20000000
T = 8 h	260000000	20000	18000000

## Sheet: S6Fig
T = 0 h						T = 2 h
Strain	CmS	CmS	CmR	CmR		Strain	CmS	CmS	CmR	CmR
LL-37	-	+	-	+		LL-37	-	+	-	+
CFUs	1160000	1160000	1210000	1210000		CFUs	24900	289000	19200	16600
CFUs	1260000	1260000	1240000	1240000		CFUs	29100	306000	20600	19400
